# Supplementary material
Source: Royal Society of Chemistry journal article supplement (doi:10.1039/d6py00228e)
Supplement: d6py00228e1.pdf [file d6py00228e1.pdf]

## Study on the Microstructure of Poly(Amide 6-Ether)

### Copolymers and Application in Elastic Fibers

**Yixiao Yu**<sup>1</sup>, **Weicheng Yang**<sup>1</sup>, **Yuhao Wu**<sup>1</sup>, **Shengming Zhang**<sup>1\*</sup>, **Chengzhen Meng**<sup>1</sup>, **Peng Ji**<sup>2\*</sup>, **Chaosheng Wang**<sup>1</sup>, **Huaping Wang**<sup>3\*</sup>

<sup>1</sup> State Key Laboratory of Advanced Fiber Materials, College of Materials Science and Engineering, Donghua University, Shanghai 201620, China. [lydiayyx@163.com](mailto:lydiayyx@163.com); [2217389849@qq.com](mailto:2217389849@qq.com); [wuyuhao0616@163.com](mailto:wuyuhao0616@163.com); [smzhang@dhu.edu.cn](mailto:smzhang@dhu.edu.cn); [1222706@mail.dhu.edu.cn](mailto:1222706@mail.dhu.edu.cn); [cswang@dhu.edu.cn](mailto:cswang@dhu.edu.cn);

<sup>2</sup> Innovation Center for Textile Science and Technology, Donghua University, Shanghai 201620, P. R. China. [jipeng@dhu.edu.cn](mailto:jipeng@dhu.edu.cn).

<sup>3</sup> Key Laboratory of High Performance fibers & products, Ministry of Education, Donghua University, Shanghai, 201620, P. R. China. [wanghp@dhu.edu.cn](mailto:wanghp@dhu.edu.cn).

#### Corresponding Authors

Shengming Zhang\* - State Key Laboratory of Advanced Fiber Materials, College of Materials Science and Engineering, Donghua University, Shanghai 201620, P. R. China. Email: [smzhang@dhu.edu.cn](mailto:smzhang@dhu.edu.cn).

Peng Ji\* - Innovation Center for Textile Science and Technology, Donghua University, Shanghai 201620, P. R. China. Email: [jipeng@dhu.edu.cn](mailto:jipeng@dhu.edu.cn).

Huaping Wang\* - Key Laboratory of High Performance fibers & products, Ministry of Education, Donghua University, Shanghai, 201620, P. R. China. Email: [wanghp@dhu.edu.cn](mailto:wanghp@dhu.edu.cn).

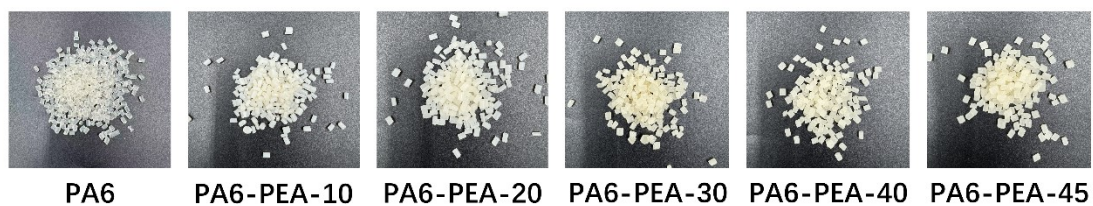

**Figure S1.** The pellets of PA6-PEA copolymers.

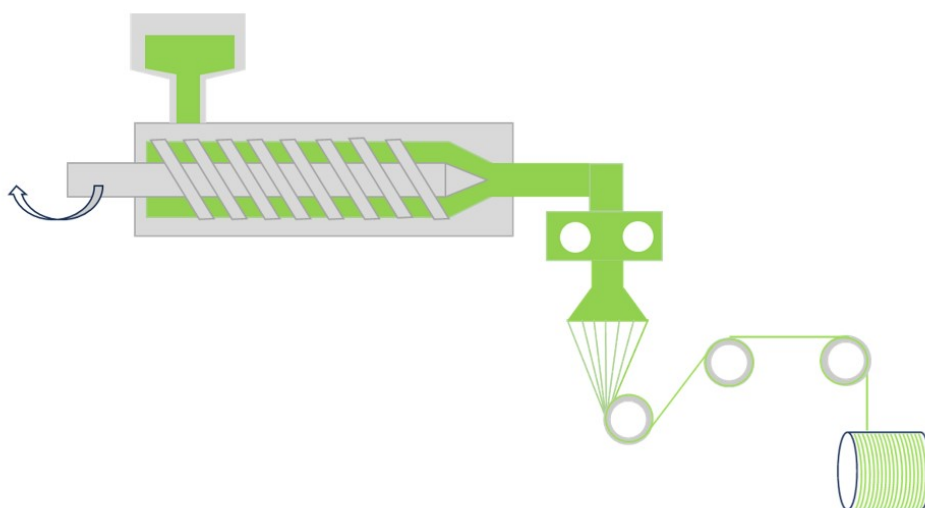

**Figure S2.** The schematic diagram of the melt spinning process.

**Table S1.** Spinning parameters of PA6-PEA elastic fibers.

| Item                                 | Parameters |     |     |     |
|--------------------------------------|------------|-----|-----|-----|
|                                      | I          | II  | III | IV  |
| Screw temperature (°C)               | 255        | 270 | 265 | 265 |
| Metering pumps temperature (°C)      |            | 265 |     |     |
| Spinning components temperature (°C) |            | 265 |     |     |
| Number of spinneret holes            |            | 36  |     |     |
| Spinneret aperture (mm)              |            | 0.4 |     |     |
| Spinning speed (m/min)               |            | 800 |     |     |

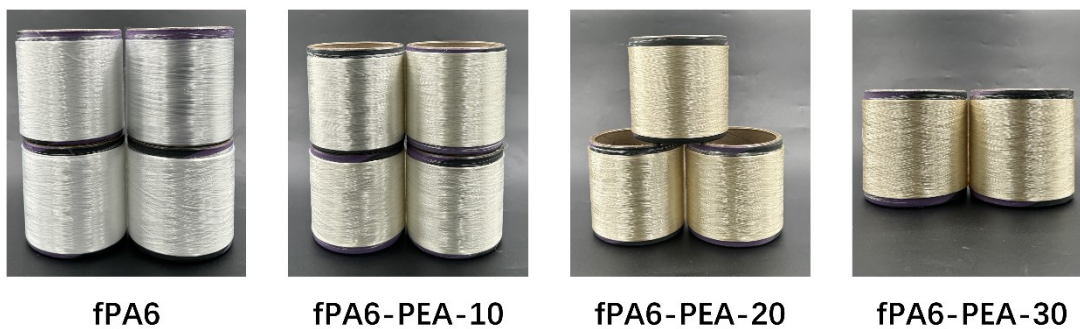

Figure S3. PA6 fiber and PA6-PEA elastic fiber.

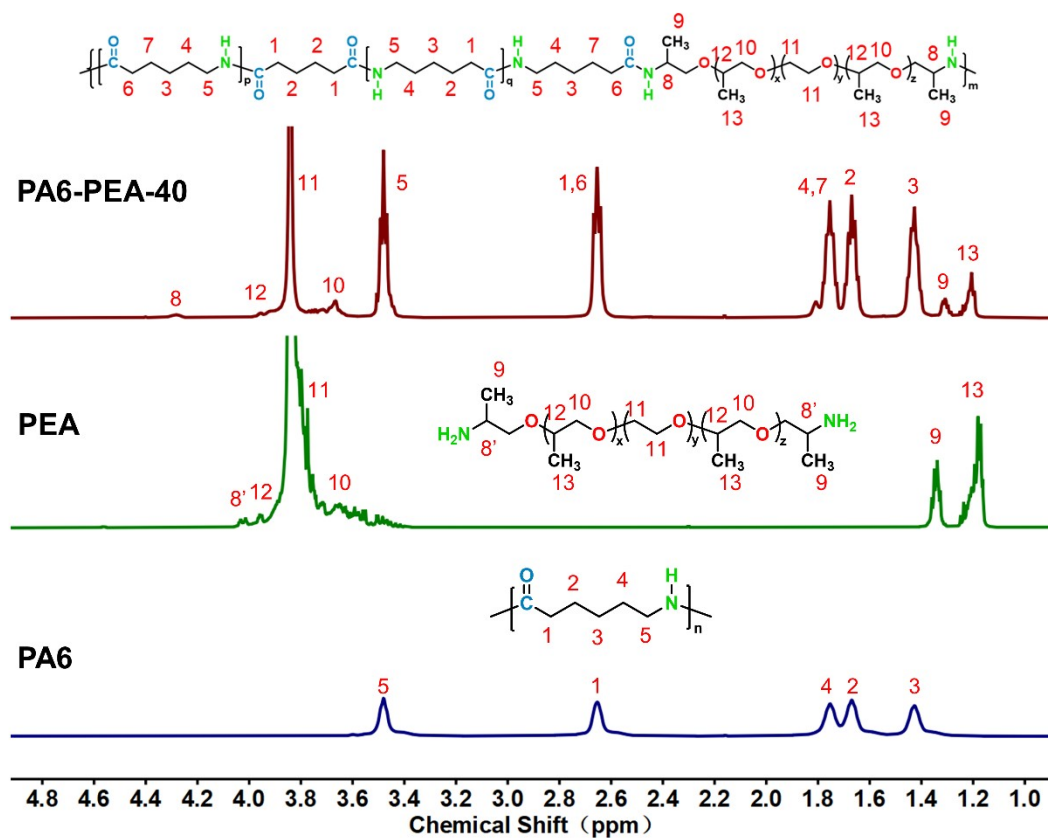

Figure S4. <sup>1</sup>H NMR spectra of PA6-PEA-40, PEA and PA6.

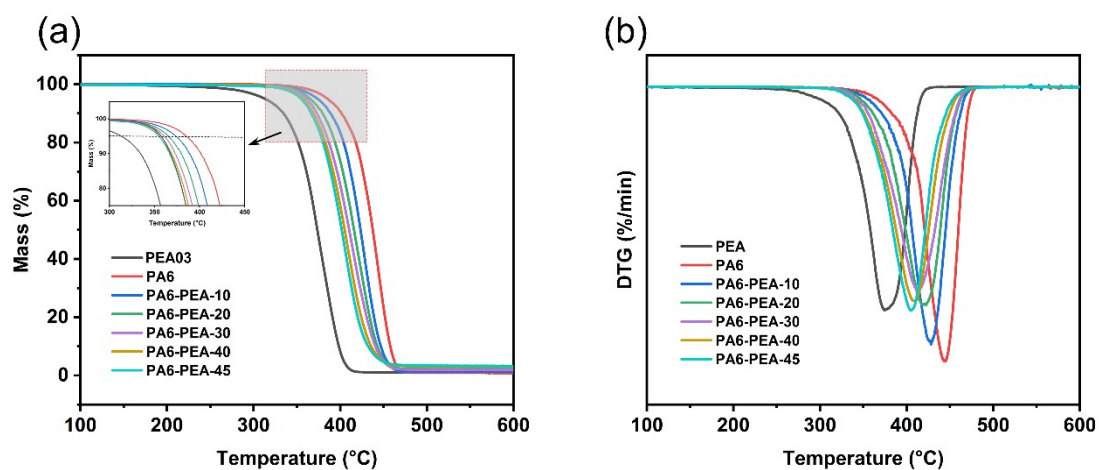

**Figure S5.** Thermal properties curves of PA6-PEA copolymers: (a) Thermal gravimetric curve and (b) DTG curve.

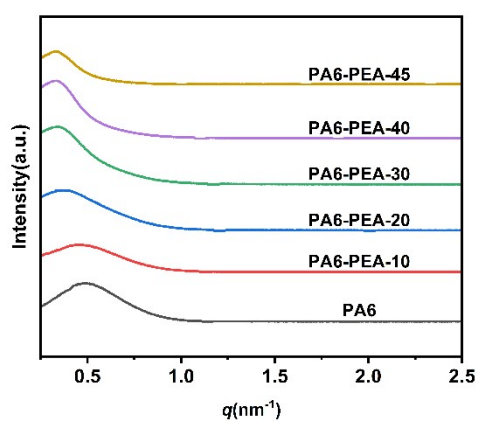

**Figure S6.** SAXS profiles of PA6-PEA copolymer.

**Table S2.** long period ( $D$ ) of PA6-PEA copolymer

| Sample   | PA6   | PA6-PEA-10 | PA6-PEA-20 | PA6-PEA-30 | PA6-PEA-40 | PA6-PEA-45 |
|----------|-------|------------|------------|------------|------------|------------|
| $D$ (nm) | 12.98 | 13.62      | 16.93      | 18.42      | 18.64      | 18.92      |

**Table S3.** The mechanical property parameters of PA6-PEA copolymers.

| Sample     | Elastic Modulus (MPa) | Tensile Strength (MPa) | Elongation at Break (%) |
|------------|-----------------------|------------------------|-------------------------|
| PA6        | 1141.89±92.60         | 55.30±0.52             | 211.80±8.68             |
| PA6-PEA-10 | 1100.32 ± 48.59       | 51.00 ± 1.11           | 57.38 ± 4.27            |
| PA6-PEA-20 | 692.64±54.26          | 43.49±2.35             | 259.91±15.54            |
| PA6-PEA-30 | 360.79±4.45           | 42.87±2.43             | 349.69±11.61            |
| PA6-PEA-40 | 174.99±4.60           | 37.08±1.17             | 460.45±18.59            |
| PA6-PEA-45 | 123.16±5.99           | 25.99±2.11             | 380.03±12.69            |

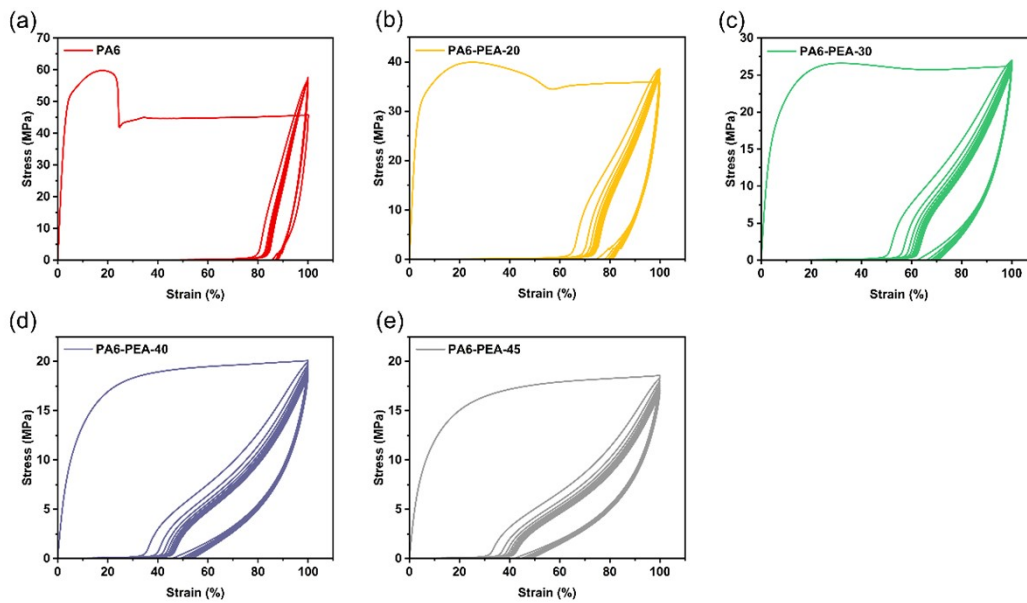**Figure S7.** Cyclic tensile curves of PA6 and PA6-PEA copolymers after 10 cycles at 100% strain.**Table S4.** Elastic recovery ratio of PA6-PEA copolymers after 10 cycles of stretching.

| Sample     | Elastic recovery ratio (%) |
|------------|----------------------------|
| PA6        | 14.81                      |
| PA6-PEA-20 | 19.41                      |
| PA6-PEA-30 | 29.92                      |
| PA6-PEA-40 | 46.56                      |
| PA6-PEA-45 | 51.45                      |

**Table S5.** Dissipated energy data of PA6-PEA copolymers after 1st, 3rd, 5th, 7th, 9th and 10th cycles.

| Sample      | Dissipated energy (kJ/m <sup>3</sup> ) |        |        |        |        |        |
|-------------|----------------------------------------|--------|--------|--------|--------|--------|
|             | 1th                                    | 3th    | 5th    | 7th    | 9th    | 10th   |
| PA6         | 4500.35                                | 331.96 | 294.27 | 278.86 | 269.74 | 266.00 |
| PA6-PEA-20  | 3363.39                                | 425.91 | 355.86 | 327.27 | 310.07 | 303.71 |
| PA6-PEA -30 | 2224.86                                | 377.47 | 314.60 | 287.35 | 270.51 | 264.01 |
| PA6-PEA -40 | 1497.72                                | 296.37 | 246.41 | 223.87 | 209.51 | 204.04 |
| PA6-PEA -45 | 1343.23                                | 253.56 | 211.13 | 191.90 | 179.75 | 175.11 |

**Table S6.** Hysteresis ratio data of PA6-PEA copolymers after 1st, 3rd, 5th, 7th, 9th and 10th cycles.

| Sample      | Hysteresis ratio (%) |       |       |       |       |       |
|-------------|----------------------|-------|-------|-------|-------|-------|
|             | 1th                  | 3th   | 5th   | 7th   | 9th   | 10th  |
| PA6         | 96.27                | 59.12 | 56.02 | 54.82 | 54.14 | 53.84 |
| PA6-PEA-20  | 93.42                | 64.42 | 60.83 | 59.34 | 58.41 | 58.06 |
| PA6-PEA -30 | 89.66                | 60.73 | 57.00 | 55.34 | 54.27 | 53.85 |
| PA6-PEA -40 | 84.07                | 52.08 | 48.28 | 46.42 | 45.17 | 44.68 |
| PA6-PEA -45 | 82.74                | 48.45 | 44.64 | 42.79 | 41.56 | 41.07 |

**Table S7.** Water absorption diffusion coefficient of PA6 and PA6-PEA copolymers.

| Sample     | D (mm <sup>2</sup> /s) |
|------------|------------------------|
| PA6        | 4.25×10 <sup>-7</sup>  |
| PA6-PEA-20 | 6.65×10 <sup>-6</sup>  |
| PA6-PEA-30 | 1.68×10 <sup>-5</sup>  |
| PA6-PEA-40 | 2.77×10 <sup>-5</sup>  |
| PA6-PEA-45 | 3.31×10 <sup>-5</sup>  |

**Table S8.** Mechanical properties of PA6 fiber and PA6-PEA elastic fibers.

| Sample      | Strength (cN/dtex) | Elongation at Break (%) | Modulus (cN/dtex) |
|-------------|--------------------|-------------------------|-------------------|
| fPA6        | DR=1.5             | 1.73±0.19               | 172.57±12.95      |
|             | DR=2.0             | 2.33±0.04               | 114.62±6.75       |
|             | DR=2.5             | 3.01±0.14               | 79.88±4.73        |
|             | DR=3.0             | 3.86±0.10               | 38.76±4.14        |
| fPA6-PEA-10 | DR=1.5             | 1.97±0.08               | 143.50±6.74       |
|             | DR=2.0             | 2.55±0.09               | 75.93±3.30        |
|             | DR=2.5             | 3.34±0.08               | 44.45±2.89        |
|             | DR=3.0             | 3.98±0.11               | 18.85±1.23        |
| fPA6-PEA-20 | DR=1.5             | 1.80±0.05               | 116.80±5.03       |
|             | DR=2.0             | 2.33±0.08               | 58.86±3.76        |
|             | DR=2.5             | 3.23±0.10               | 28.59±2.29        |
| fPA6-PEA-30 | DR=1.5             | 1.57±0.02               | 79.41±2.47        |
|             | DR=2.0             | 2.18±0.10               | 38.47±2.23        |

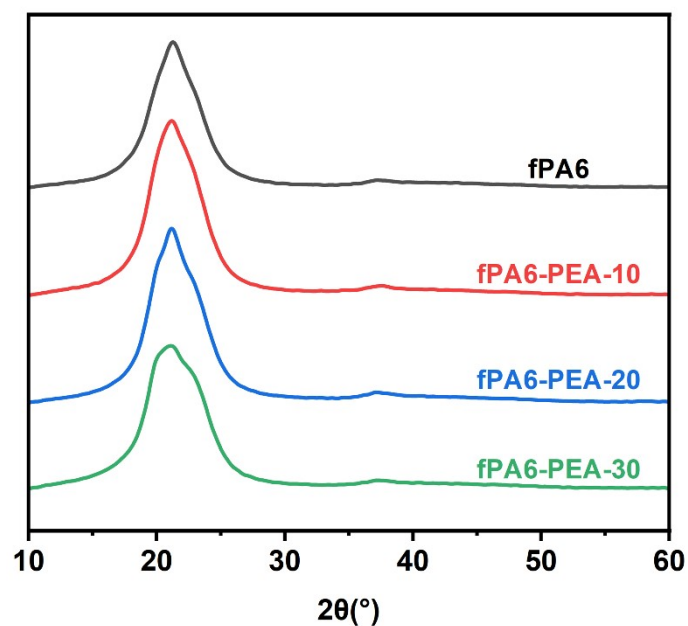**Figure S8.** XRD spectrum of PA6 fiber and PA6-PEA elastic fibers at 2.0 times draft.

**Table S9.** Crystallinity of PA6 fiber and PA6-PEA elastic fibers at 2.0 times draft.

| Sample      | Crystallinity (%) |
|-------------|-------------------|
| fPA6        | 53.12             |
| fPA6-PEA-10 | 51.02             |
| fPA6-PEA-20 | 48.79             |
| fPA6-PEA-30 | 46.57             |

**Table S10.** Moisture regain data of PA6 fiber and PA6-PEA elastic fibers

| Sample              | fPA6      | fPA6-PEA-10 | fPA6-PEA-20 | fPA6-PEA-30 |
|---------------------|-----------|-------------|-------------|-------------|
| Moisture regain (%) | 4.98±0.19 | 5.91±0.21   | 6.62±0.12   | 7.23±0.56   |

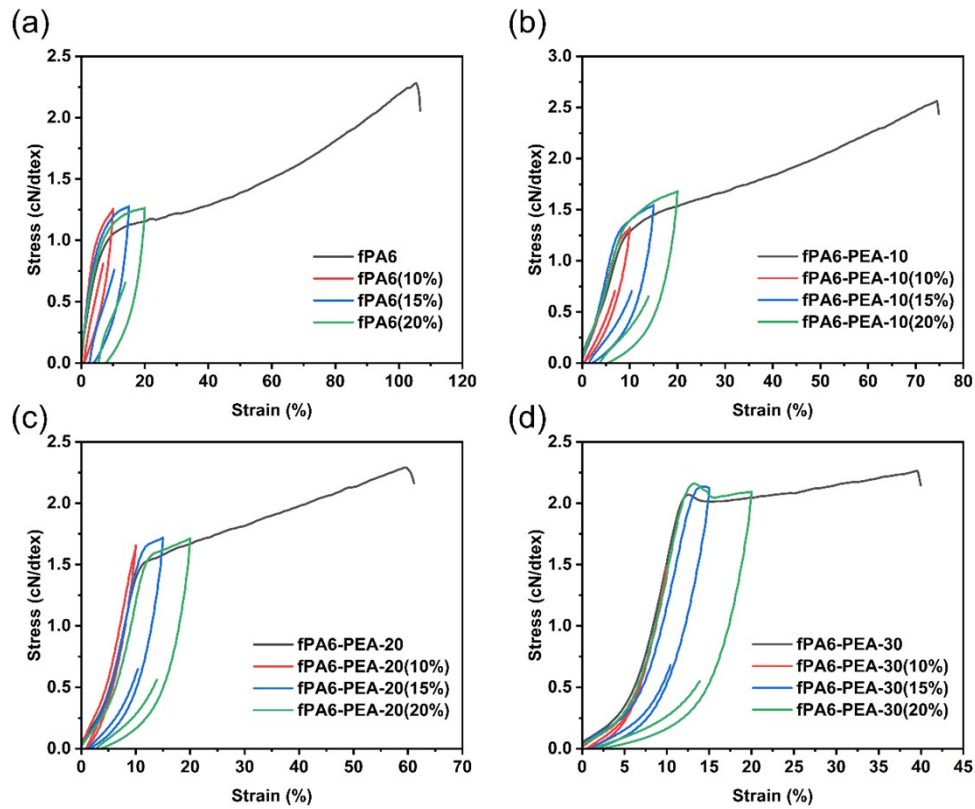**Figure S9.** Stress-strain curves and Elastic recovery curves: (a) fPA6, (b) fPA6-PEA-10, (c) fPA6-PEA-20 and (d) fPA6-PEA-30.

**Table S11.** Elastic recovery rate of PA6 fiber and PA6-PEA elastic fibers.

| Sample      |        | 10%        | 15%        | 20%        |
|-------------|--------|------------|------------|------------|
| fPA6        | DR=1.5 | 90.00±1.00 | 82.89±0.38 | 76.67±1.15 |
|             | DR=2.0 | 92.33±0.58 | 83.33±1.15 | 74.33±1.89 |
|             | DR=2.5 | 91.33±0.58 | 81.11±1.02 | 69.68±0.28 |
|             | DR=3.0 | 94.67±0.58 | 80.44±0.77 | 71.75±0.35 |
| fPA6-PEA-10 | DR=1.5 | 91.67±0.58 | 90.89±0.38 | 85.50±1.80 |
|             | DR=2.0 | 96.00±1.00 | 90.89±1.39 | 81.83±0.29 |
|             | DR=2.5 | 96.00±2.00 | 89.56±1.54 | 81.33±1.26 |
|             | DR=3.0 | 97.33±0.58 | 90.89±1.39 | /          |
| fPA6-PEA-20 | DR=1.5 | 94.03±1.70 | 91.78±1.02 | 86.67±0.76 |
|             | DR=2.0 | 92.67±2.08 | 92.22±0.39 | 87.30±1.82 |
|             | DR=2.5 | 95.33±0.58 | 89.78±1.39 | 85.17±0.58 |
| fPA6-PEA-30 | DR=1.5 | 94.13±2.32 | 93.87±0.87 | 91.88±1.04 |
|             | DR=2.0 | 93.84±0.79 | 94.00±1.95 | 93.00±1.00 |

**Table S12.** Elastic recovery data of PA6 fiber and PA6-PEA elastic fibers after 5 cycles at 10% constant elongation.

| Sample      | Rapid elastic recovery rate (%) | Slow elastic recovery rate (%) | Elastic recovery rate (%) | Stress relaxation (%) |
|-------------|---------------------------------|--------------------------------|---------------------------|-----------------------|
| fPA6        | 74.00±2.00                      | 24.33±1.53                     | 98.33±0.58                | 23.02                 |
| fPA6-PEA-10 | 88.67±1.53                      | 10.50±1.32                     | 99.17±0.29                | 16.86                 |
| fPA6-PEA-20 | 90.00±1.73                      | 8.83±1.61                      | 98.83±0.29                | 14.62                 |
| fPA6-PEA-30 | 90.33±3.21                      | 8.83±3.33                      | 99.16±0.29                | 1.89                  |

$$E_R = (L_1 - L_2)/L_1 \times 100\% \quad (S1)$$

$$E_S = (L_1 - L_3)/L_1 \times 100\% \quad (S2)$$

Where  $L_1$  is the maximum tensile strain during the fiber cyclic stretching process,  $L_2$  is the strain corresponding to when the stress reaches zero for the first time during the last recovery process, and  $L_3$  is the strain corresponding to when stress begins to appear during the stretching process after 30s of recovery.

**Table S13.** Elastic recovery data of PA6 fiber and PA6-PEA elastic fibers after 5 cycles at 15% constant elongation.

| Sample      | Rapid elastic recovery rate (%) | Slow elastic recovery rate (%) | Elastic recovery rate (%) | Stress relaxation (%) |
|-------------|---------------------------------|--------------------------------|---------------------------|-----------------------|
| fPA6        | 57.33±0.67                      | 21.78±1.39                     | 79.11±1.02                | 24.27                 |
| fPA6-PEA-10 | 74.00±0.67                      | 16.00±1.16                     | 90.00±0.67                | 19.95                 |
| fPA6-PEA-20 | 85.55±0.39                      | 11.56±0.38                     | 97.11±0.77                | 17.03                 |
| fPA6-PEA-30 | 88.22±2.34                      | 10.22±1.39                     | 98.44±1.02                | 12.41                 |

**Table S14.** Elastic recovery data of PA6 fiber and PA6-PEA elastic fibers after 5 cycles at 20% constant elongation.

| Sample      | Rapid elastic recovery rate (%) | Slow elastic recovery rate (%) | Elastic recovery rate (%) | Stress relaxation (%) |
|-------------|---------------------------------|--------------------------------|---------------------------|-----------------------|
| fPA6        | 46.50±0.50                      | 18.17±0.29                     | 64.67±0.76                | 25.06                 |
| fPA6-PEA-10 | 61.33±0.58                      | 14.00±5.00                     | 75.33±0.29                | 20.55                 |
| fPA6-PEA-20 | 75.00±1.50                      | 11.17±0.58                     | 86.17±1.04                | 17.17                 |
| fPA6-PEA-30 | 84.17±2.25                      | 10.33±1.04                     | 92.50±1.32                | 13.24                 |

Table S15. Sound velocity orientation data for PA6 fibers and PA6-PEA elastic fibers.

| Sample      | Drawing ratio | $f_a$ |
|-------------|---------------|-------|
| fPA6        | 1.5           | 0.50  |
|             | 2.0           | 0.59  |
|             | 2.5           | 0.66  |
|             | 3.0           | 0.70  |
| fPA6-PEA-10 | 1.5           | 0.34  |
|             | 2.0           | 0.49  |
|             | 2.5           | 0.59  |
|             | 3.0           | 0.63  |
| fPA6-PEA-20 | 1.5           | 0.11  |
|             | 2.0           | 0.27  |
|             | 2.5           | 0.41  |
| fPA6-PEA-30 | 1.5           | 0.09  |
|             | 2.0           | 0.21  |
